# Supplementary material
Source: PubMed Central journal article supplement (PMC7196026)
Supplement: NIHMS1543038-supplement-1.pdf [file NIHMS1543038-supplement-1.pdf]

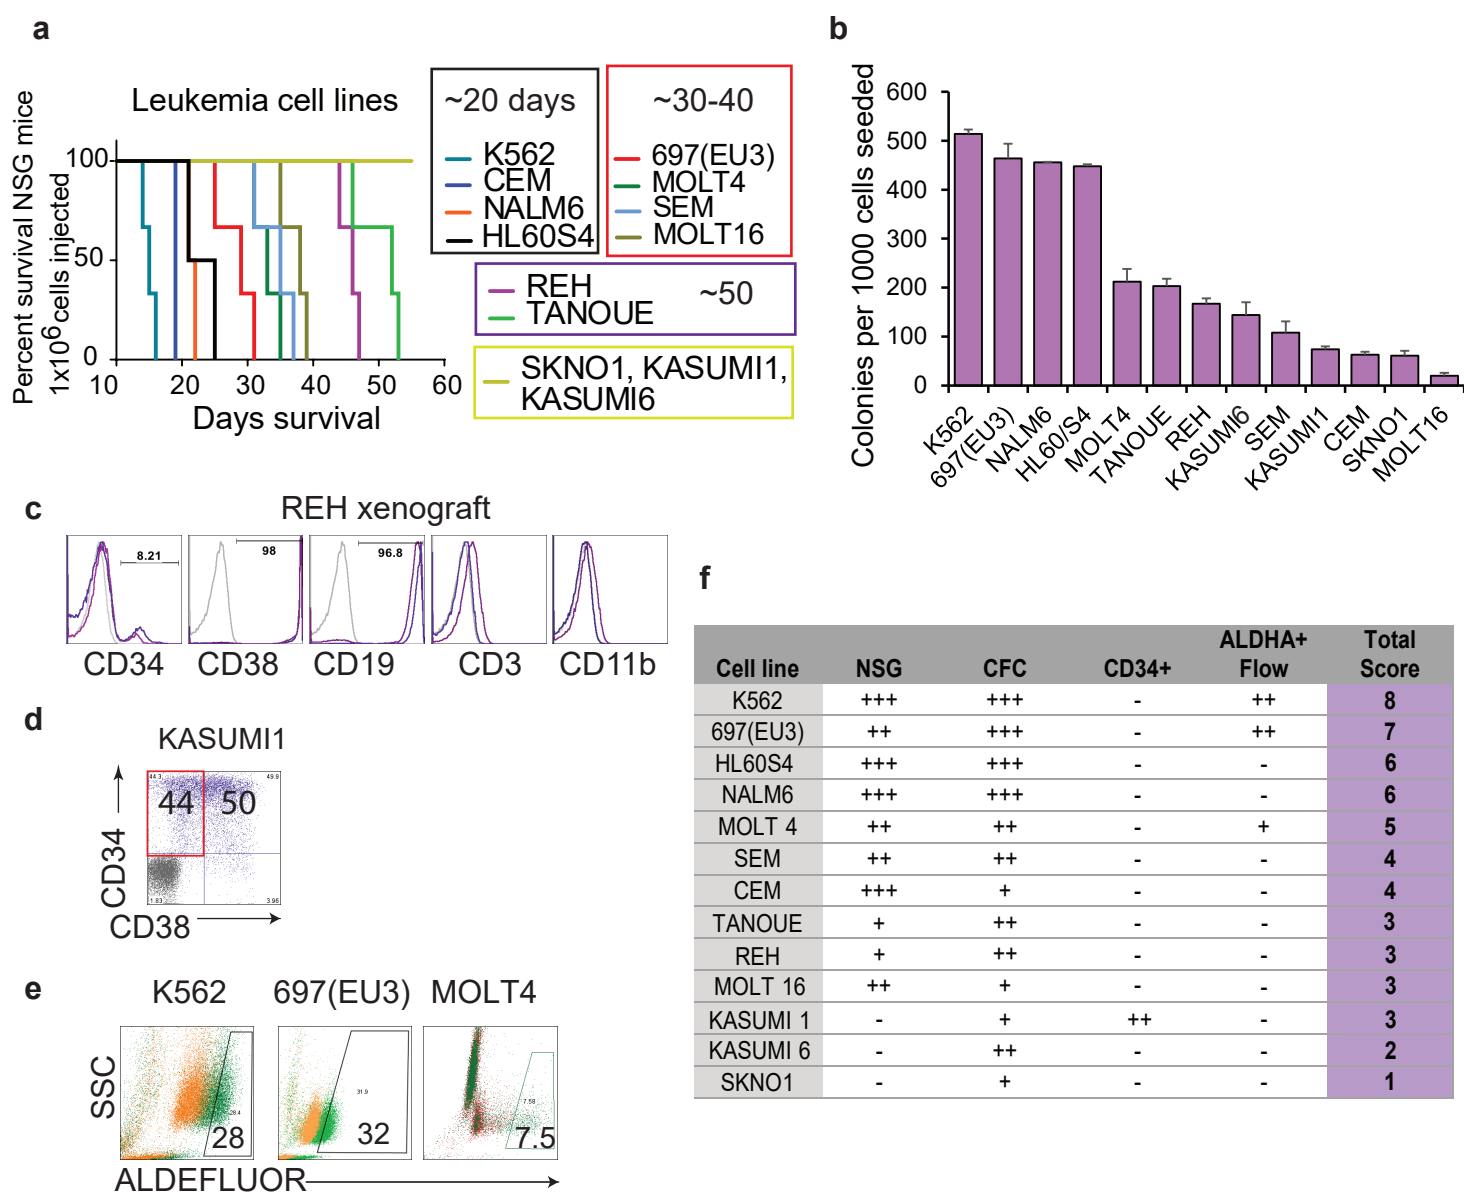

### Supplementary Figure 1. Assessment of cancer stem cell properties in leukemia cell lines.

**a**, Kaplan-Meier survival analysis of NSG mice injected with  $1 \times 10^6$  genetically unmodified, original cell lines. Cell lines were grouped by tumorigenicity: very high tumorigenicity – mice lethality ~20 days post-injection or sooner (K562, CEM, NALM6, HL60/S4); high tumorigenicity – mice lethality ~ 30-40 days post-injection (697(EU3), MOLT4, SEM, and MOLT16); medium tumorigenicity- mice lethality ~ 50-60 days post-injection (REH, TANOUE); low or absent tumorigenicity - more than 3 months or never (SKNO1, KASUMI1, KASUMI6); **b**, CFC assay of original cell lines ( $n=3$ ,  $\pm$  SEM); **c**, Flow cytometric analysis of NSG mouse bone marrow stained with the human hematopoietic stem cell (CD34 and CD38), B-cell (CD19), T-cell (CD3), and myeloid (CD11b) markers, REH xenograft ( $n=2$ ); **d**, Flow cytometric analysis of CD34 and CD38 expression in KASUMI1 in vitro cultures, gated CD34<sup>+</sup>/CD38<sup>-</sup> subpopulation. **e**, ALDEFLUOR staining of three cell lines with gated ALDH<sup>+</sup> populations. **f**, Cumulative scores for the stem cell properties based on the conducted assays.

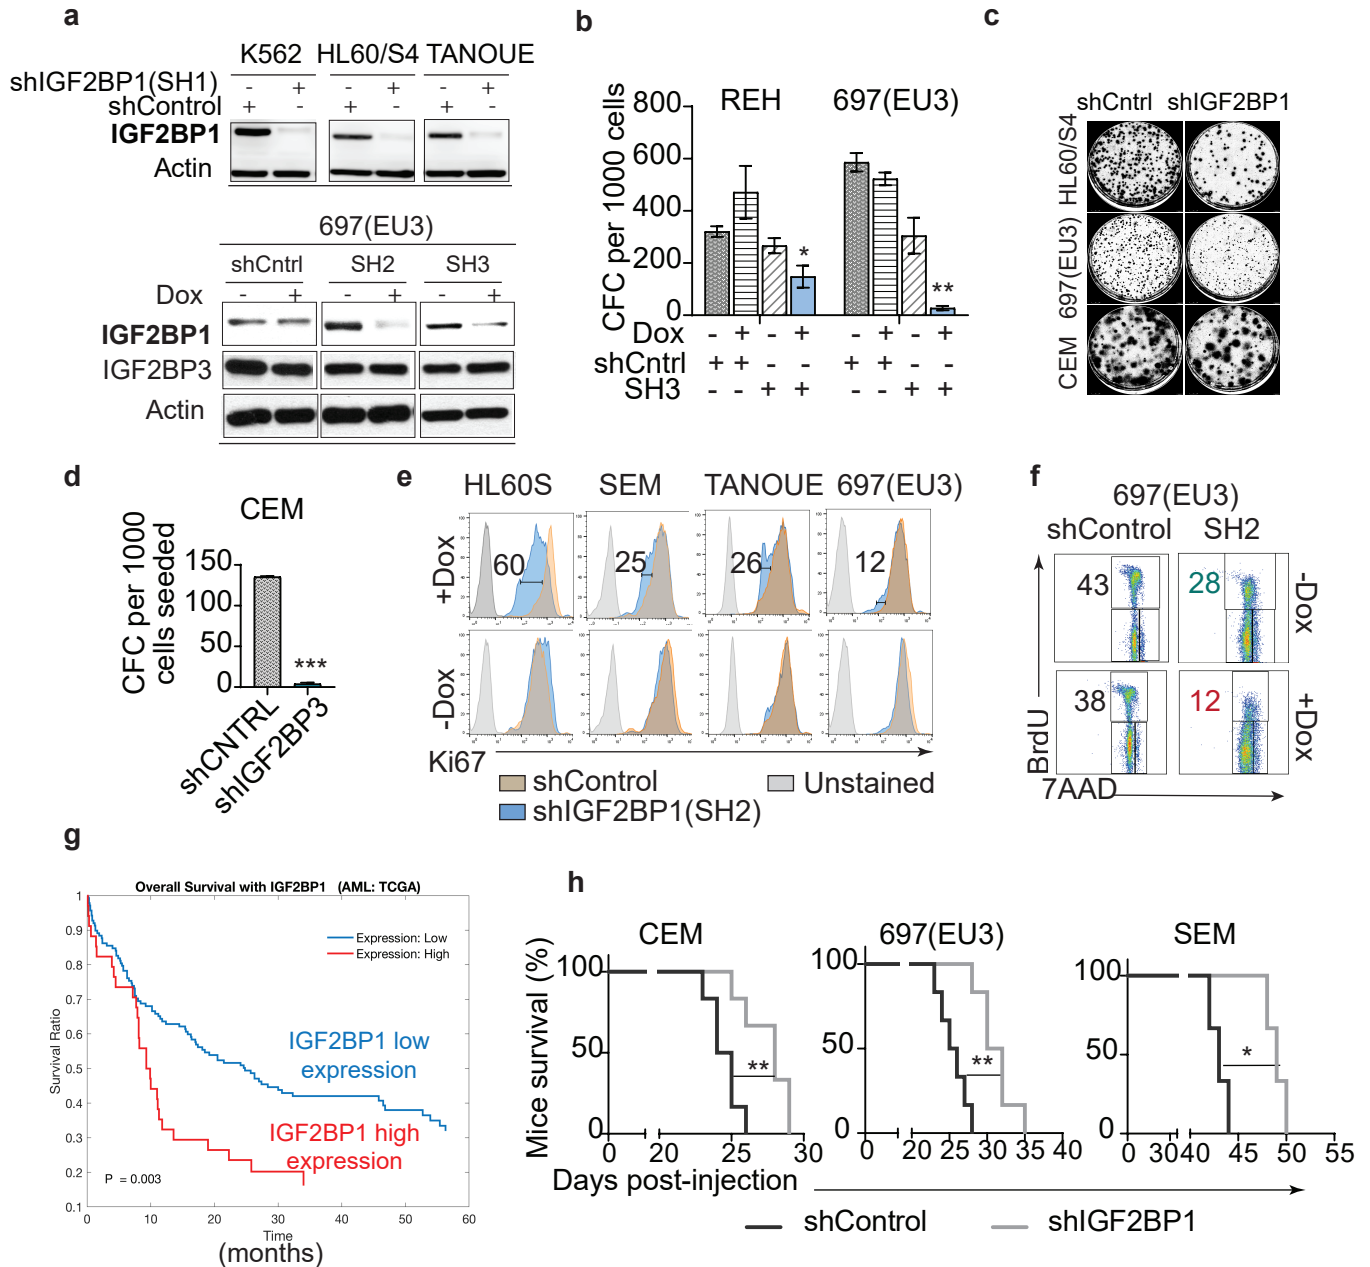

**Supplementary Figure 2. IGF2BP1 loss-of-function reduces leukemia cell growth and tumorigenesis.**

**a**, Western blot analysis of indicated proteins in cells expressing constitutive shIGF2BP1(SH1), doxycycline-inducible shIGF2BP1 (SH2 and SH3), and shControls. **b**, Colony-Forming Cell (CFC) assay for leukemia cell lines with doxycycline-inducible shIGF2BP1(SH3) knockdown and shControl (t-test, \*P<0.05, \*\*P<0.01, n=3, ± SEM); **c**, A phase contrast photograph of CFC assays shIGF2BP1(SH1) knockdown and shControl; **d**, CFC assay for CEM leukemia cell line with shIGF2BP3 knockdown and a scrambled shControl (t-test, \*\*\*P<0.001, n=3, ± SEM); **e**, Flow cytometric analysis of Ki67 staining in selected leukemia cell lines with doxycycline-induced expression of shIGF2BP1(SH2) or shControl; **f**, Representative flow cytometric analysis of BrdU staining in 697(EU3) with doxycycline-inducible IGF2BP1(SH2) knockdown; **g**, The overall survival of AML patients with high (red) and low (blue) levels of IGF2BP1 expression, TCGA database; **h**, Kaplan-Meier survival analysis of mice transplanted with B- and T-cell leukemia cells with and without stable IGF2BP1(SH1) knockdown (Mantel-Cox test, \*\*P=0.0062 (CEM, n=6), \*\*P=0.0012 (697(EU3), n=6), \*P=0.0246 (SEM, n=3)).

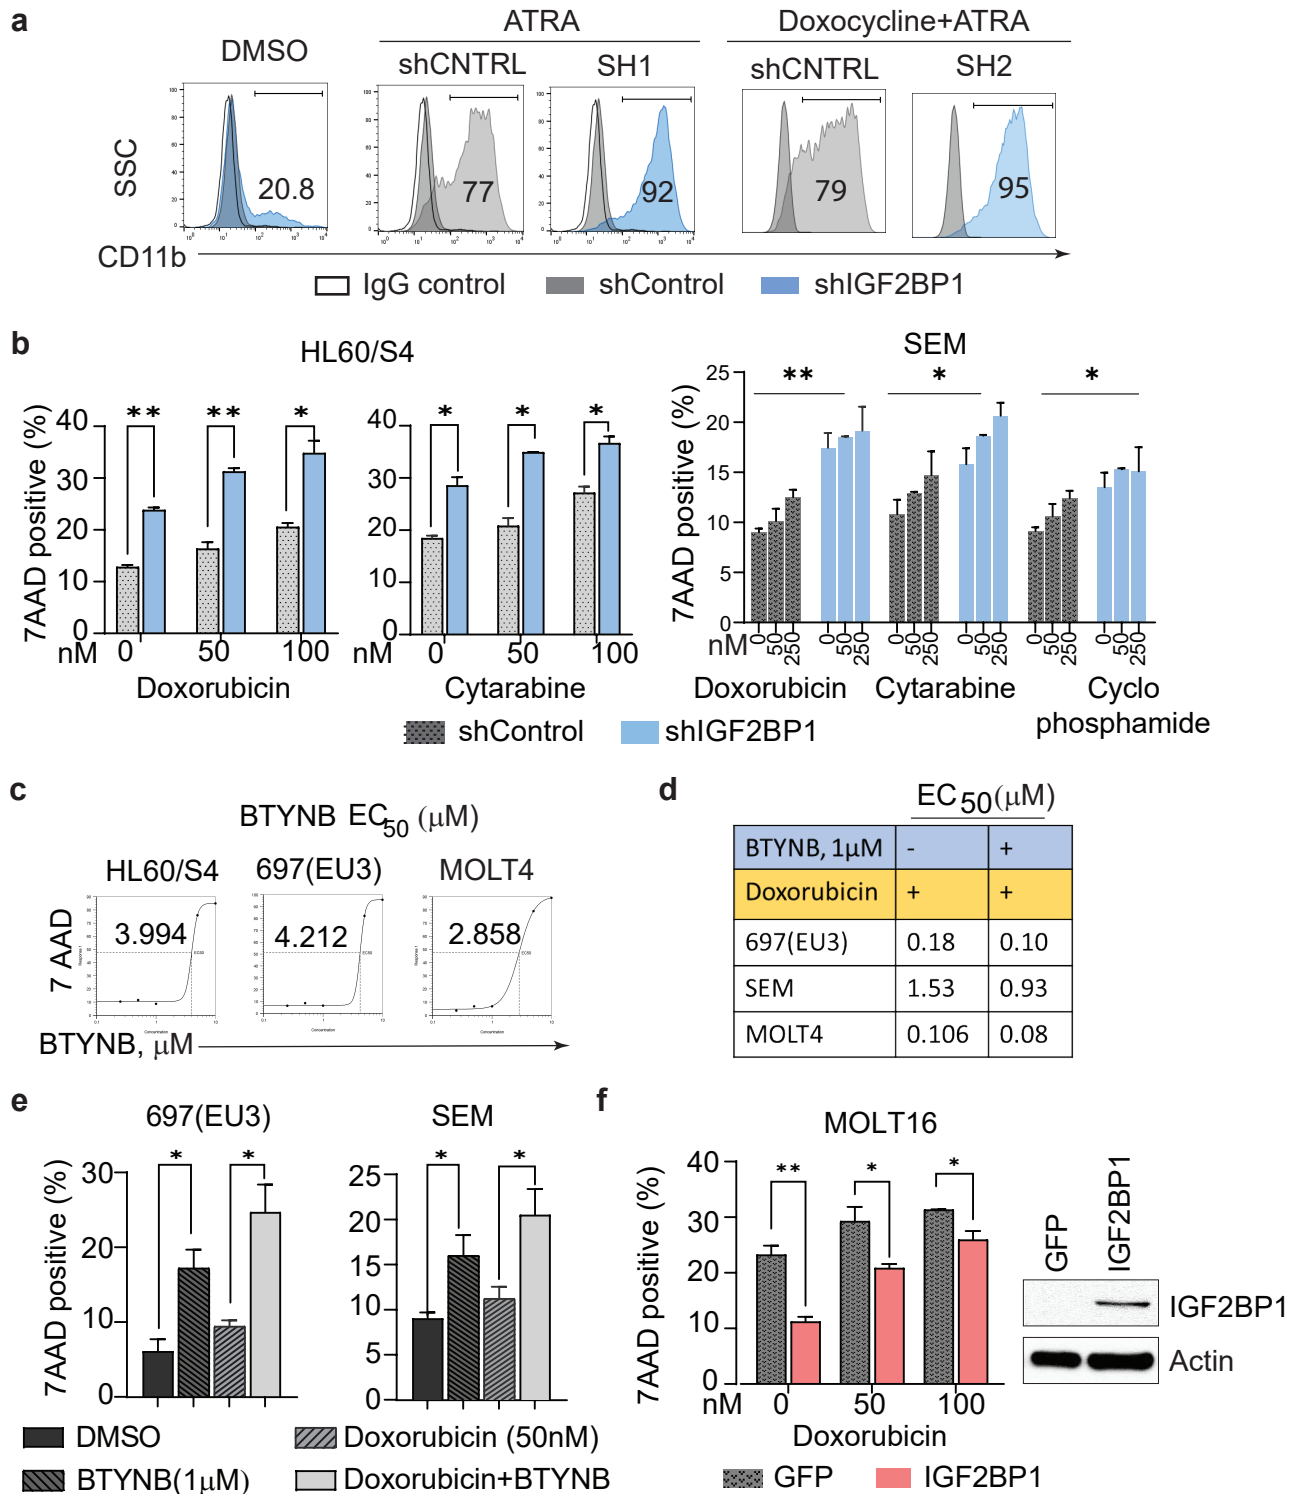

**Supplementary Figure 3. IGF2BP1 loss-of-function increases sensitivity of leukemia cells to chemotherapeutic drugs.** **a**, Flow cytometric analysis of CD11b expression after DMSO or all-trans retinoid acid (ATRA) HL60/S4 treatments, day 4. Left graph: spontaneous differentiation upon shIGF2BP1(SH1) expression; Right graphs: ATRA treatments. All differentiations are compared to shControl treated with DMSO; **b**, Cell viability HL60/S4 and SEM expressing shIGF2BP1(SH1) 24 hrs post-treatment (t-tests, \*P<0.05, \*\*P<0.01, n=3, ± SEM); **c**, EC<sub>50</sub> of BTYNB (IGF2BP1 inhibitor) in indicated leukemia cell lines, day 4; **d**, Table EC<sub>50</sub> for doxorubicin (50nM) only, and combined doxorubicin (50nM)/BTYNB(1μM) treatments in indicated cell lines; **e**, Cell viability assessment of 697(EU3) and SEM cells treated with DMSO, BTYNB (1 μM), doxorubicin (50 nM) and combined doxorubicin/BTYNB components, 24 hrs (t-test, \*P<0.05, n=3, ± SEM); **f**, Dose-response assessment of cell viability in MOLT16 with forced expression of IGF2BP1 and GFP control, 24 hrs post doxorubicin treatment (t-test, \*P<0.05, \*\*P<0.01, n=3, ± SEM). Right panel: Western blot for IGF2BP1 and beta-actin.

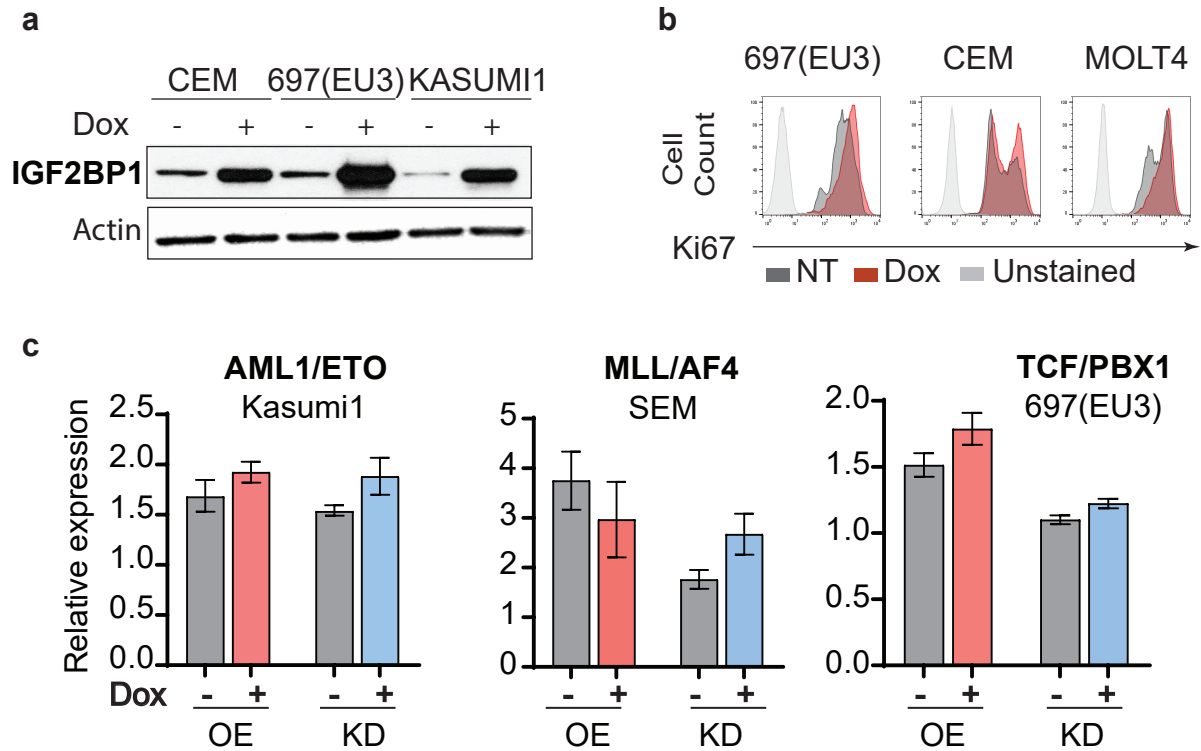

**Supplementary Figure 4. IGF2BP1 gain-of-function effect on cell proliferation and expression of fusion transcripts.** **a**, Representative Western blot analysis of IGF2BP1 expression in cell lines with doxycycline-inducible overexpression of IGF2BP1; **b**, Flow cytometric analysis of Ki67 staining in selected leukemia cell lines with IGF2BP1 overexpression (red); **c**, qPCR analysis of indicated fusion transcripts with doxycycline-inducible overexpression (OE) and knockdown (KD) of IGF2BP1 with SH2.



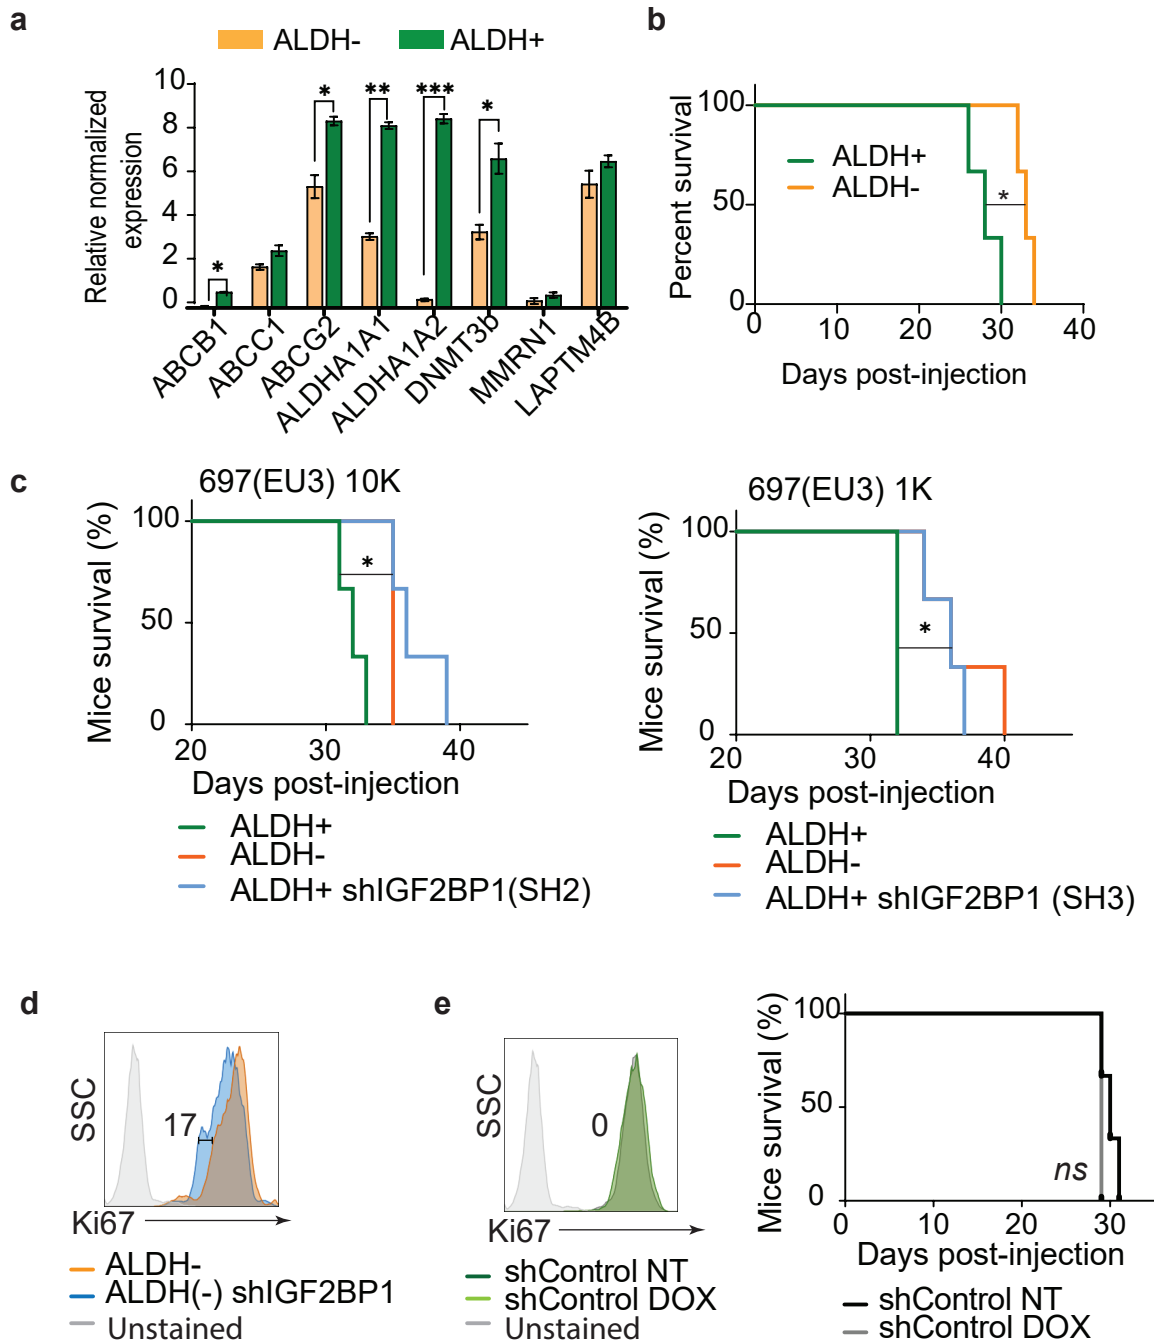

**Supplementary Figure 5. IGF2BP1 expression supports leukemia cancer stem cell properties.**

**a**, Quantitative PCR of ALDH<sup>-</sup> and ALDH<sup>+</sup> subpopulations (t-test, \* $P < 0.05$ , \*\* $P < 0.01$ , \*\*\* $P < 0.001$ ,  $n = 3$ ,  $\pm$  SEM); **b**, Kaplan-Meier survival analysis of NSG mice transplanted with  $2.5 \times 10^5$  ALDH<sup>-</sup> and ALDH<sup>+</sup> cells (Mantel-Cox test, \* $P = 0.0245$ ,  $n = 5$ ). **c**, Kaplan-Meier survival analysis of mice injected with indicated ALDH subpopulations and IGF2BP1 knockdown. The left panel:  $1 \times 10^4$  cells, shIGF2BP1(SH2),  $n = 3$ . The right panel:  $1 \times 10^3$  cells, shIGF2BP1(SH3),  $n = 3$ . **d**, Flow cytometric analysis of Ki67 staining of 697(EU3) ALDH<sup>-</sup> cells with and without doxycycline-induced shIGF2BP1(SH2); **e**, Flow cytometric analysis of Ki67 staining of 697(EU3) ALDH<sup>+</sup> cells with and without doxycycline-induced shControl, and Kaplan-Meier survival analysis of mice injected with  $1 \times 10^3$  697(EU3) ALDH<sup>+</sup> cells with and without doxycycline-induced shControl,  $n = 3$ , not significant.

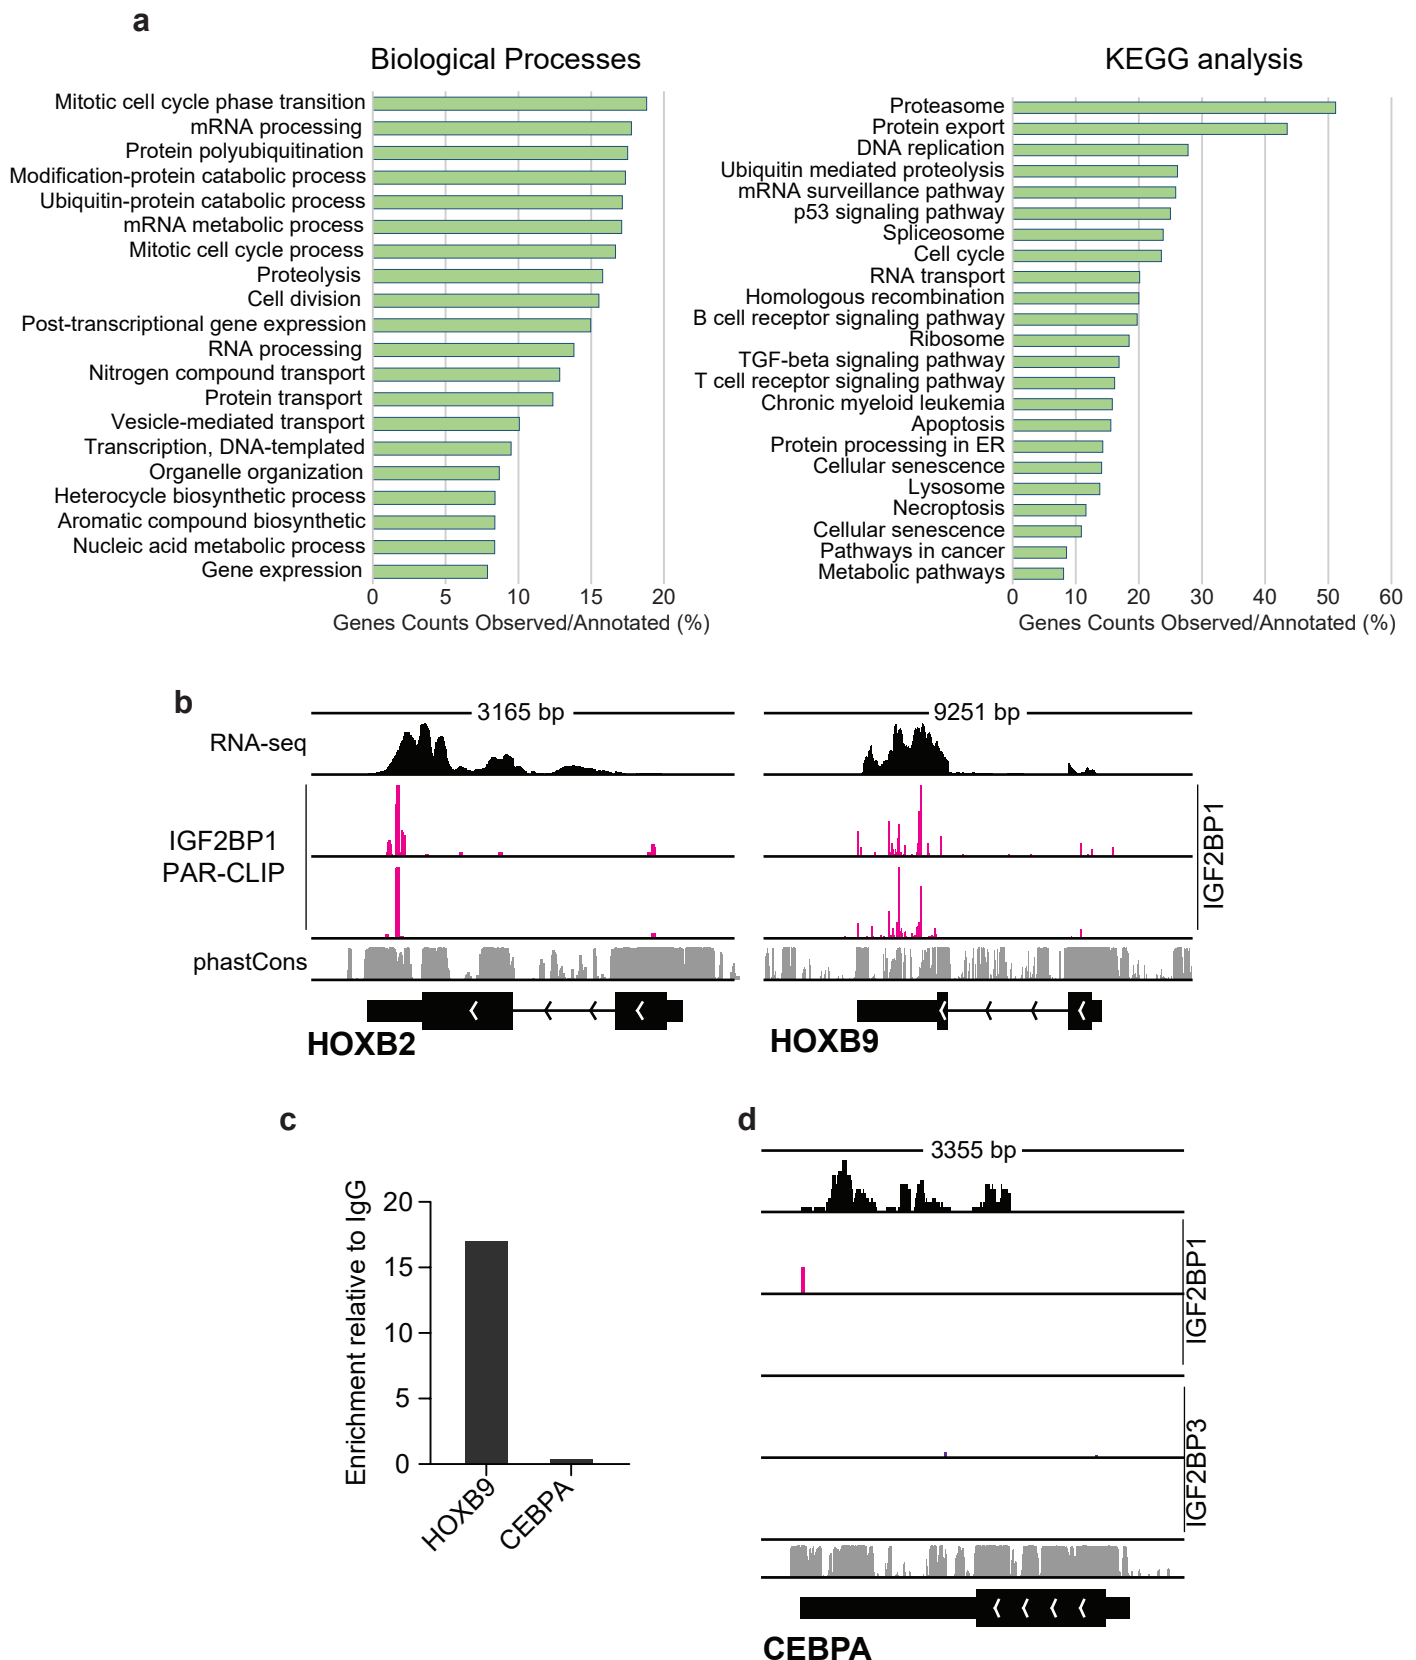

**Supplementary Figure 6. PAR-CLIP analysis of K562 CML cells.**

**a**, Gene Ontology (GO) and KEGG pathway analysis for mRNAs bound with IGF2BP1 in PAR-CLIP assay;

**b**, The representative screenshots of two independent PAR-CLIP experiments illustrating the amplification (vertical red bars) in IGF2BP1-mRNA-binding sites of HOXB2 and

HOXB9; **c**, Quantitative analysis for HOXB9 and CEBPA mRNA enrichment in anti-IGF2BP1

cross-linking immunoprecipitations (CLIP) relative to anti-IgG immunoprecipitations ( $n=3$ );

**d**, The screenshots of two independent PAR-CLIP experiments illustrating IGF2BP1 and

IGF2BP3 fewer binding sites with CEBPA mRNA. IGF2BP1 (two upper panels, a red bar)

and IGF2BP3 (two lower panels, a blue bar).

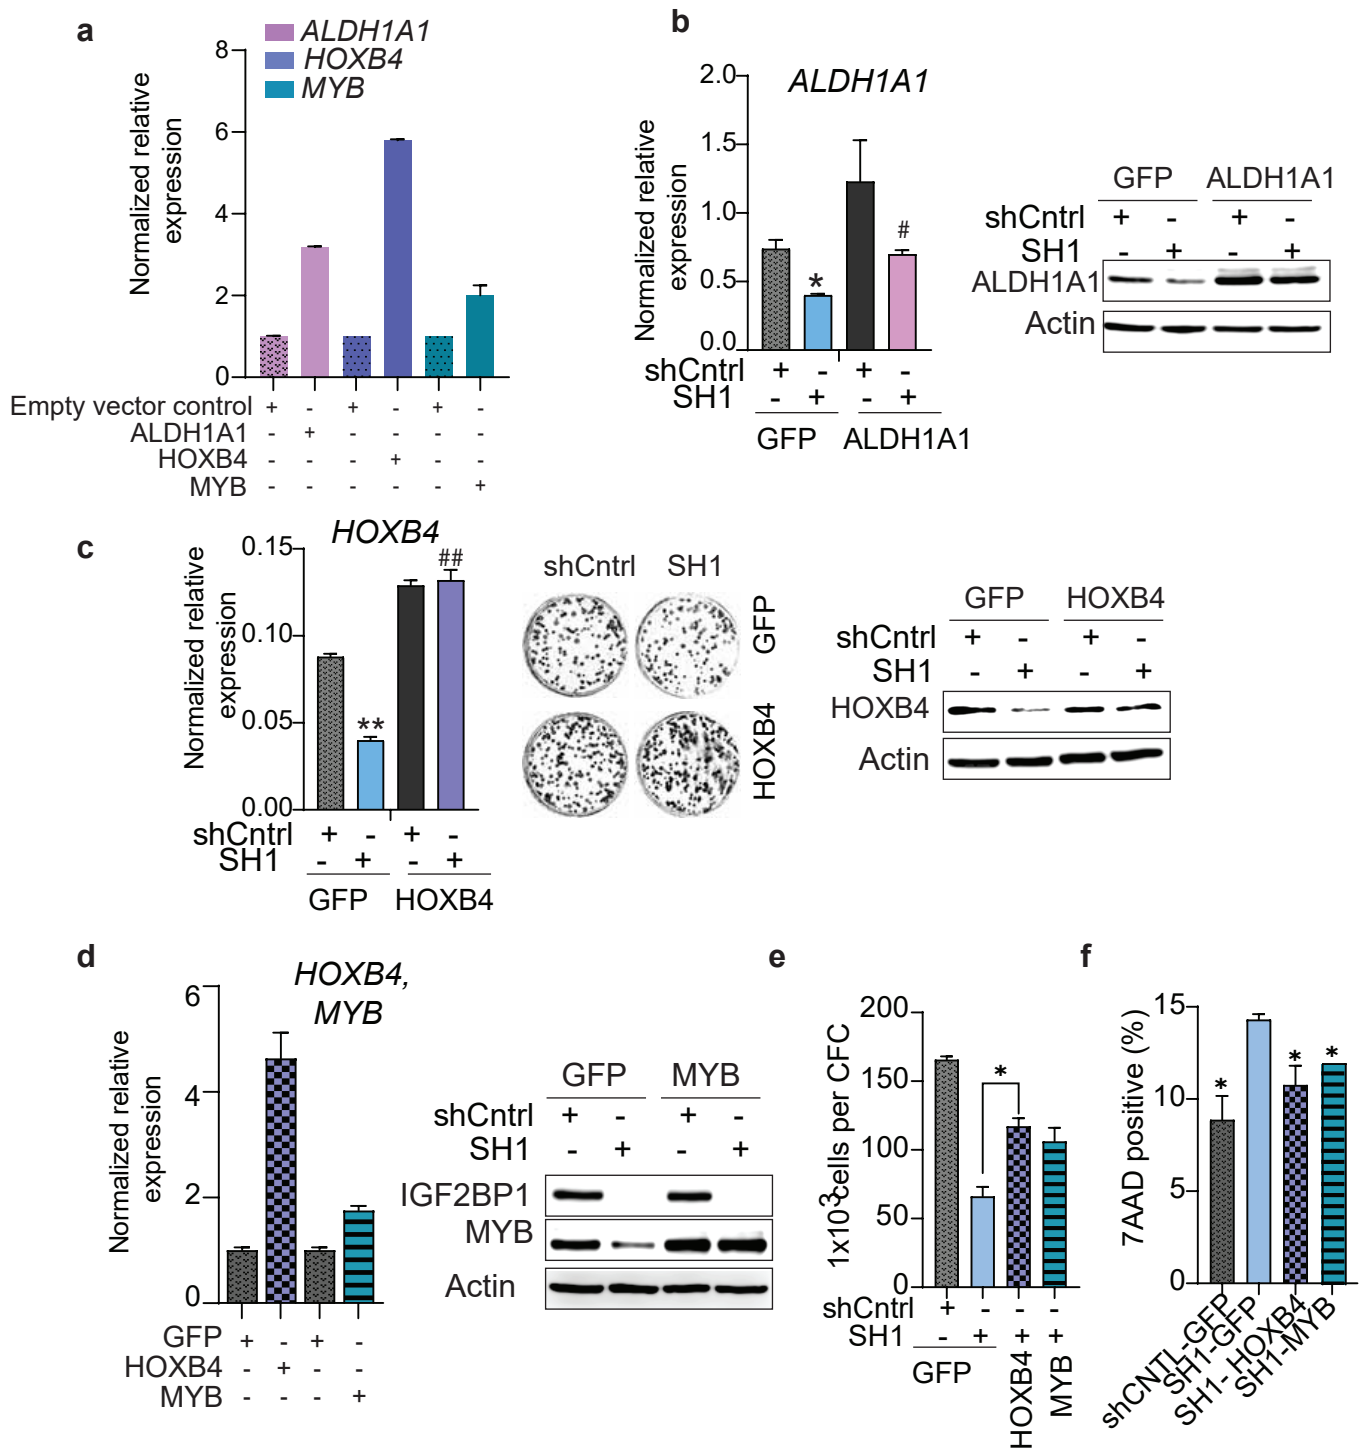

### Supplementary Figure 7. The ectopic expression of stem cell genes rescues

**IGF2BP1 loss-of-function phenotype in leukemia.** **a**, qPCR analysis of ALDH1A1, HOXB4, MYB expression in K562 transduced with indicated vectors for gene's overexpression; **b**, qPCR and Western blot analysis of ALDH1A1 expression in 697(EU3) cells seeded for CFC assay, day 1 of CFC (t-test for shControl and SH1-GFP: \* $P < 0.05$ ,  $n = 3$ ,  $\pm$  SEM), (t-test for SH1-GFP and SH1-ALDH1A1: # $P < 0.05$ ,  $n = 3$ ,  $\pm$  SEM); **c**, qPCR of HOXB4 expression in HL60/S4 colonies, day 14 of CFC (t-test for shCntrl-GFP and SH1-GFP: \*\* $P < 0.01$ ,  $n = 3$ ,  $\pm$  SEM), (t-test for SH1-GFP and SH1-HOXB4: ## $P < 0.01$ ,  $n = 3$ ,  $\pm$  SEM) (left); Western blot analysis of HOXB4 expression in cells seeded for CFC, day 1 of CFC (right). **d**, qPCR analysis of HOXB4, MYB over-expression and Western blot analysis of IGF2BP1 and MYB expression in K562 cells seeded for CFC assay, day 1 of CFC; **e**, CFC assays for K562 cells co-expressing constitutive shIGF2BP1 or shControl in combination with GFP, HOXB4, or MYB, day 14 (t-test, \* $P < 0.05$ ,  $n = 3$ ,  $\pm$  SEM); **f**, Cell viability assay in K562 expressing indicated constructs (t-test, \* $P < 0.05$ ,  $n = 3$ ,  $\pm$  SEM);
