# Supplementary material
Source: PubMed Central journal article supplement (PMC7196026)
Supplement: NIHMS1543038-supplement-2.pdf [file NIHMS1543038-supplement-2.pdf]

## Supplemental Tables

**Supplementary Table 1.** Leukemia cell lines.

| #  | Cell line | Histological subtype | Gene fusion                | Gender, Age |
|----|-----------|----------------------|----------------------------|-------------|
| 1  | K562      | CML                  | <i>BCR-ABL1</i>            | f,53        |
| 2  | HL60/S4   | AML                  | --                         | f, 35       |
| 3  | KASUMI6   | AML, M2 type         | --                         | m,64        |
| 4  | KASUMI1   | AML                  | <i>t(8;21) AML1-CBF2T1</i> | m,7         |
| 5  | SKNO1     | AML, M2 type         | <i>t(8;21)AML1-CBF2T1</i>  | m, 22       |
| 6  | SEM       | pre B- ALL           | <i>MLL-AF4</i>             | f,5         |
| 7  | TANOUE    | pre B- ALL           | <i>IGH@-MYC</i>            | m, 11       |
| 8  | REH       | pre B- ALL           | <i>ETV6-AML1</i>           | f,15        |
| 9  | NALM6     | pre B- ALL           | --                         | m, 19       |
| 10 | 697(EU-3) | pre B- ALL           | <i>TCF3(E2A)-PBX1, M7</i>  | m,12        |
| 11 | CEM3      | T-cell ALL           | --                         | f,3         |
| 12 | MOLT4     | T-cell ALL           | --                         | m,19        |
| 13 | MOLT16    | T-cell ALL           | <i>TRA@-MYC</i>            | f,5         |

**Supplementary Table 2. Antibodies.**

| <b>Gene Name</b>              | <b>Company</b>              | <b>Catalog #</b>            | <b>IgG Type</b>            | <b>Dilution, (technique#)</b> |
|-------------------------------|-----------------------------|-----------------------------|----------------------------|-------------------------------|
| <b>CD34-APC*</b>              | Miltenyi Biotech            | 130-098-139/<br>130-113-738 | Mouse IgG2a                | 1:50 (FC)                     |
| <b>CD38-PE*</b>               | Miltenyi Biotech            | 130-110-344/<br>130-117-829 | Recombinant human IgG1     | 1:50 (FC)                     |
| <b>CD19-PE*</b>               | Miltenyi Biotech            | 130-110-350/<br>130-114-172 | Recombinant human IgG1     | 1:50 (FC)                     |
| <b>CD3-PE*</b>                | Miltenyi Biotech            | 130-109-540/<br>130-113-701 | Recombinant human IgG1     | 1:50 (FC)                     |
| <b>CD11b-PE</b>               | Miltenyi Biotech            | 130-110-553                 | Recombinant human IgG1     | 1:50 (FC)                     |
| <b>CD11b-PE</b>               | BioLegend                   | 301306                      | Mouse IgG1, κ              | 1:20 (FC)                     |
| <b>IgG1k-PE</b>               | BioLegend                   | 400112                      | Mouse IgG, κ ctrl          | 1:20 (FC)                     |
| <b>REA Ctrl(S)-PE</b>         | Miltenyi Biotech            | 130-113-438                 | Recombinant human IgG1ctrl | 1:50 (FC)                     |
| <b>IgG-APC*</b>               | Miltenyi Biotech            | 130-091-835/<br>130-113-272 | Mouse IgG2a ctrl           | 1:50 (FC)                     |
| <b>IGF2BP1</b>                | Cell Signaling Technologies | 8482S                       | Rabbit                     | 1:1000 (WB)                   |
| <b>IGF2BP2</b>                | MBL                         | RN008P                      | Rabbit                     | 1:1000 (WB)                   |
| <b>IGF2BP3</b>                | MBL                         | RN009P                      | Rabbit                     | 1:1000 (WB)                   |
| <b>ALDH1A1</b>                | Cell Signaling Technologies | 12035S                      | Rabbit                     | 1:1000 (WB)                   |
| <b>ALDH1A1</b>                | Novus Biologicals           | NBP2-15336                  | Rabbit                     | 1:1000 (WB)                   |
| <b>HOXB4</b>                  | Invitrogen                  | PA5-23366                   | Rabbit                     | 1:1000 (WB)                   |
| <b>HOXB4</b>                  | Novus Biologicals           | NBP2-24561                  | Rabbit                     | 1:1000 (WB)                   |
| <b>MYB</b>                    | Cell Signaling Technologies | 12319S                      | Rabbit                     | 1:1000 (WB)                   |
| <b>beta-actin</b>             | Cell Signaling Technologies | 4970S                       | Rabbit                     | 1:2000 (WB)                   |
| <b>HRP-linked anti-rabbit</b> | Cell Signaling Technologies | 7074S                       | Goat                       | 1:2000 (WB)                   |

#FC- Flow cytometry, WB- Western blotting.

\*Previous catalog number/Current catalog number

**Supplementary Table 3.** Short hairpin (sh) RNA-expressing vectors used for gene silencing.

| <b>Construct Name</b>  | <b>Insert (targeting site)</b>                      | <b>Plasmid Name</b>                                  | <b>Catalog#</b>         | <b>Company</b> |
|------------------------|-----------------------------------------------------|------------------------------------------------------|-------------------------|----------------|
| <b>shIGF2BP1 (SH1)</b> | ACGCTTAGAGATTGAACATTC<br>(coding region of IGF2BP1) | MISSION®<br>pLKO.1-puro                              | TRCN0000218079;         | Sigma          |
| <b>shIGF2BP1 (SH2)</b> | TTCCTTGCCAATGAGACGC<br>(coding region of IGF2BP1)   | SMARTvector<br>Inducible<br>TurboGFP shRNA           | V3SH11252-<br>227953809 | Dharmacon      |
| <b>shIGF2BP1 (SH3)</b> | AAAATACATCGTTCCTCT<br>(3'UTR of IGF2BP1)            | SMARTvector<br>Inducible<br>TurboGFP shRNA           | V3SH11252-<br>228438084 | Dharmacon      |
| <b>shIGF2BP3</b>       | CGGTGAATGAACTTCAGAATT<br>(coding region of IGF2BP3) | MISSION®<br>pLKO.1-puro<br>TRCN0000074675            | TRCN0000074675          | Sigma          |
| <b>shControl</b>       | Targets no known mammalian genes                    | MISSION®<br>pLKO.1-puro                              | SHC002                  | Sigma          |
| <b>shControl</b>       | Non-targeting control                               | SMARTvector<br>Inducible Non-<br>targeting Control 1 | VSC11653                | Dharmacon      |

**Supplementary Table 4.** Plasmids for genes' overexpression.

| <b>Construct Name</b>                               | <b>Insert</b>                | <b>Plasmid Name</b>      | <b>Catalog#</b>               | <b>Company</b>                        |
|-----------------------------------------------------|------------------------------|--------------------------|-------------------------------|---------------------------------------|
| <b><i>gfp</i></b><br>(nucleofection control)        | YP_002302326.1               | pmaxGFP                  | included in the kit V4XP-3012 | Lonza                                 |
| <b><i>gfp</i></b><br>(lentiviral control)           | YP_002302326.1               | pLV-EF1a-IRES-Puro       | #85132                        | Addgene<br>(Dr. Meyer lab)            |
| <b><i>gfp</i></b><br>(inducible lentiviral control) | YP_002302326.1               | pINDUCER20               | #44012                        | Addgene<br>(Dr. Stephen Elledge, lab) |
| <b>Empty vector control</b>                         | n/a                          | pReceiver-Lv105          | EX-NEG-Lv105                  | GeneCopoeia                           |
| <b><i>IGF2BP1</i></b>                               | NM_006546.4                  | pLKO,hIMP1_3G            | n/a                           | Dr. Joel Yisraeli lab                 |
|                                                     | NM_006546.4                  | pINDUCER20               | #44012                        | Addgene<br>(Dr. Stephen Elledge, lab) |
| <b><i>ALDH1A1</i></b>                               | NM_000689.5                  | pcDNA3-HA-ADH            | 11610                         | Addgene<br>(Dr. Steven Johnson lab)   |
|                                                     | NM_000689.4                  | pReceiver-Lv105          | EX-U0011-Lv105                | GeneCopoeia                           |
| <b><i>HOXB4</i></b>                                 | NM_024015.5                  | MSCV-humanHoxB4-IRES-YFP | 91889                         | Addgene<br>(Dr. Brian Sorrentino lab) |
|                                                     | NM_024015.4                  | pReceiver-Lv105          | EX-T1370-Lv105                | GeneCopoeia                           |
| <b><i>MYB</i></b>                                   | NM_001130173.1<br>BC064955.1 | pReceiver-Lv105          | EX-H3756-Lv105                | GeneCopoeia                           |

**Supplementary Table 5.** Chemical compounds.

| <b>Chemical Name</b>                             | <b>CAS #</b> | <b>Company</b>     | <b>Catalog #</b>      | <b>Solvent</b> | <b>Stock Concentration</b> |
|--------------------------------------------------|--------------|--------------------|-----------------------|----------------|----------------------------|
| <b>Doxycycline, Hyclate</b>                      | 24390-14-5   | Stemgent Millipore | 04-0016<br>324385-1gm | water          | 5mg/ml                     |
| <b>All-trans retinoic acid (ATRA)</b>            | 302-79-4     | Sigma              | R2625                 | DMSO           | 100 mM                     |
| <b>BTYNB</b>                                     | 304456-62-0  | Cayman Chemical    | 25623                 | DMSO           | 100 mM                     |
| <b>Doxorubicin hydrochloride</b>                 | 25316-40-9   | Tocris             | 2252                  | water          | 50 mM                      |
| <b>Cytarabine</b>                                | 147-94-4     | Tocris             | 4520                  | water          | 50 mM                      |
| <b>4-hydroperoxy-cyclophosphamide (4-OOH-CY)</b> | 39800-16-3   | Cayman Chemical    | 19527                 | chloroform     | 100 mM                     |

**Supplementary Table 6.** Primers for qPCR.

| <b>Gene Name</b>         | <b>Fwd</b>               | <b>Rev</b>                |
|--------------------------|--------------------------|---------------------------|
| ABCA2                    | AGATGGACAAGATGATCGAG     | GCTTGTACTTCAGGATGAGG      |
| ABCB1                    | GAGGAAGACATGACCAGGTA     | CTGTCCGATTATAGCATGAA      |
| ABCG2                    | ACCTGAAGGCATTTACTGAA     | TCTTTCCTTGCAGCTAAGAC      |
| ALDH1A1                  | TGTTAGCTGATGCCGACTTG     | TTCTTAGCCCCGCTCAACT       |
| ALDH1A2                  | TGATCCTGCAAACACTGCTC     | CTGGAGCTGGGTGGTAAGAG      |
| AML1-ETO (RUNX1- CBF2T1) | ATGACCTCAGGTTTGTCTGGTCCG | TGAACTGGTTCCTGGAGCCTCCT   |
| AML1-ETO (RUNX1- CBF2T1) | GGCTGGCAATGATGAAAACCT    | CGCCATTCAAGGCTGTAGGAG     |
| CD34                     | ACCAGAGCTATTCCCAAAAGACC  | TGCGGCGATTTCATCAGGAAAT    |
| DNMT3b                   | ACCTCGTGTGGGGAAAGATCA    | CCATCGCAAACCACTGGA        |
| HOXB4                    | CGTGAGCACGGTAAACCCC      | CGAGCGGATCTTGGTGTG        |
| HOXB9                    | CCATTTCTGGGACGCTTAGCA    | TTGTAAGGGTGGTAGACGGACG    |
| IGF2BP1 FL               | TGAAGGCCATCGAACTTTCTC    | GATTTGAATTTCCGGCTCCTTTG   |
| IGF2BP1 total            | GACCCCTGATGAGAACGAC      | TGGTACTCTGTCCCTTCTGA      |
| LAPTM4B                  | GCCCGGAGCGATGAAGATG      | CAACAGTACCACAGCATTGATGA   |
| MLL-AF4                  | CACCTACTACAGGACCGCCAA    | GGGGTTTGTTCCTGTCACTGTCC   |
| MLL-AF4                  | ACAGAAAAAGTGGCTCCCCG     | GCAAACCACCCTGGGTGTTA      |
| MMRN1                    | GGCATTGGGCTTAACAACAGT    | CGACATGACCCGAGTGGTT       |
| RPL13A                   | CCTGGAGGAGAAGAGGAAAGAGA  | TTGAGGACCTCTGTGTATTTGTCAA |
| RPL13A                   | CGGACCGTGCAGGTAT         | CACCATCCGCTTTTTCTTGTCT    |
| RPS18                    | ATCACCATTATGCAGAATCCACG  | GACCTGGCTGTATTTTCCATCC    |
| TCF3-PBX1                | CACCAGCCTCATGCACAAC      | TCGCAGGAGATTTCATCACG      |
| TCF3-PBX1                | CAGCACCAGCCTCATGCACA     | GTTGTCCAGCCGCATCAGCT      |
| TBP                      | CCGAAACGCCGAATATAATCC    | AATCAGTGCCGTGGTTCGTG      |
| <b>Gene Name</b>         | <b>Bio-Rad ID</b>        |                           |
| ABCB1                    | qHsaCEP0058075           | n/a                       |
| ABCC1                    | qHsaCID0016624           | n/a                       |
| ALDH1A1                  | qHsaCID0018574           | n/a                       |
| ALDH1A3                  | qHsaCED0047656           | n/a                       |
| CEBPA                    | qHsaCED0048815           | n/a                       |
| HOXB4                    | qHsaCED0047548           | n/a                       |
| HOXB9                    | qHsaCID0008079           | n/a                       |
| IGF2BP1                  | qHsaCID0010743           | n/a                       |
| IGF2BP2                  | qHsaCED0036334           | n/a                       |
| IGF2BP3                  | qHsaCED0004904           | n/a                       |
| MYB                      | qHsaCED0043781           | n/a                       |
| MYC                      | qHsaCID0012921           | n/a                       |
| RPS18                    | qHsaCED0037454           | n/a                       |
